# Supplementary material for: Phonon Transport and Thermoelectric Properties of Imidazole-Graphyne
Source: MDPI journal article supplement (doi:10.3390/ma14195604), 2021-09-27
Supplement: s1 [file s1]

# Phonon Transport and Thermoelectric Properties of Imidazole-Graphyne

Yanyan Chen<sup>1,2</sup>, Jie Sun<sup>1,2</sup>, Wei Kang,<sup>2</sup> and Qian Wang<sup>1,2\*</sup>

1 School of Materials Science and Engineering, Peking University, Beijing 100871, China

2 Center for Applied Physics and Technology, HEPDS, College of Engineering, Peking University, Beijing, 100871, China

\* Corresponding author: qianwang2@pku.edu.cn

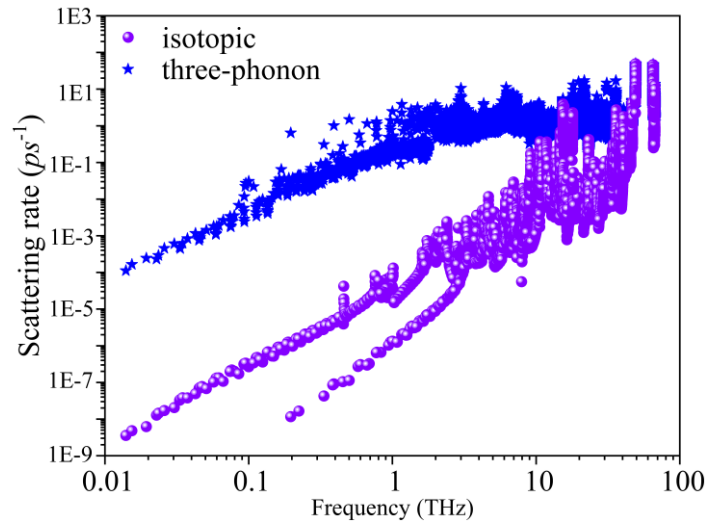

**Figure S1.** Three-phonon and isotopic scattering rates of ID-GY at room temperature.

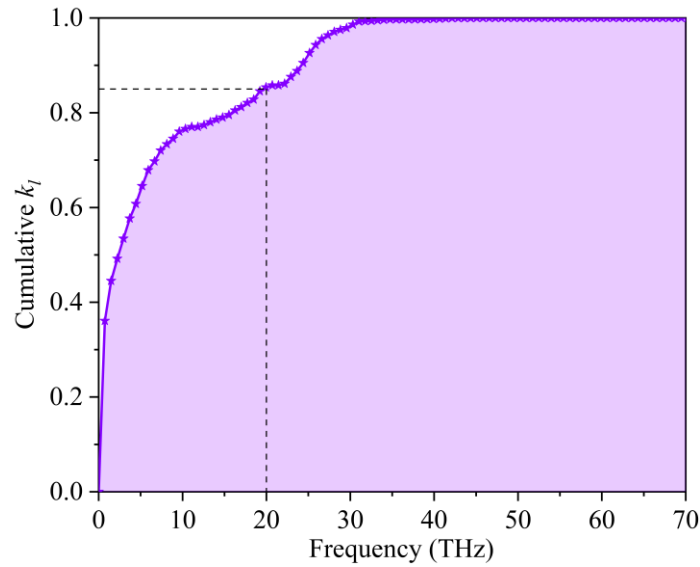

**Figure S2.** Variation of the normalized cumulative lattice thermal conductivity ( $k_l$ ) with frequency for ID-GY.
